# Supplementary material
Source: PubMed Central journal article supplement (PMC6726545)

## SUPPLEMENTAL DATA

### **Mechanisms of resistance to EGFR inhibition reveal metabolic vulnerabilities in human GBM**

Andrew McKinney<sup>1</sup>, Olle R. Lindberg<sup>1</sup>, Jane R. Engler<sup>1</sup>, Katharine Y. Chen<sup>1</sup>, Anupam Kumar<sup>1</sup>, Henry Gong<sup>1</sup>, Kan V. Lu<sup>1</sup>, Erin F. Simonds<sup>1,2</sup>, Timothy F. Cloughesy<sup>3,4</sup>, Linda M. Liao<sup>3,5</sup>, Michael Prados<sup>1</sup>, Andrew W. Bollen<sup>6</sup>, Mitchel S. Berger<sup>1</sup>, Joseph T.C. Shieh<sup>7,8</sup>, C. David James<sup>9</sup>, Theodore P. Nicolaides<sup>1,10</sup>, William H. Yong<sup>11</sup>, Albert Lai<sup>3,4</sup>, Monika E. Hegi<sup>12</sup>, William A. Weiss<sup>1,2,10</sup>, Joanna J. Phillips<sup>1,6</sup>.

**Supplemental Figure S1. Inhibition of PI3K or Src activation does not confer increased tumor cell invasion. (A-B)** Inhibition of activation of PI3K (LY294002) or Src (50nM dasatinib) did not increase invasion of GPCs in 3D spheroid invasion assays. **(C-D)** Western blots demonstrating inhibition of phosphorylation of Akt and Src at 16 hours after addition of LY294002 or dasatinib, respectively. **(E)** Decreased tumor cell proliferation upon EGFR inhibition. **(F)** Gene expression of ALDH1A1 in cells resistant to EGFR inhibition with erlotinib (Erl), AG1478, or lapatinib relative to control treated cells. **(G)** Gene expression of CXCR4, S100A4, TIMP3, EPHA4, NTRK2, CNTN1, and GAB1 in CSCs resistant to EGFR inhibition relative to control treated CSCs. Representative images and quantification, mean  $\pm$  SEM (n=3) performed twice, n.s., not significant. Scale bar = 100 $\mu$ m. \*\*\*\*p<0.0001, \*\*\*p<0.001, \*\*p<0.01.

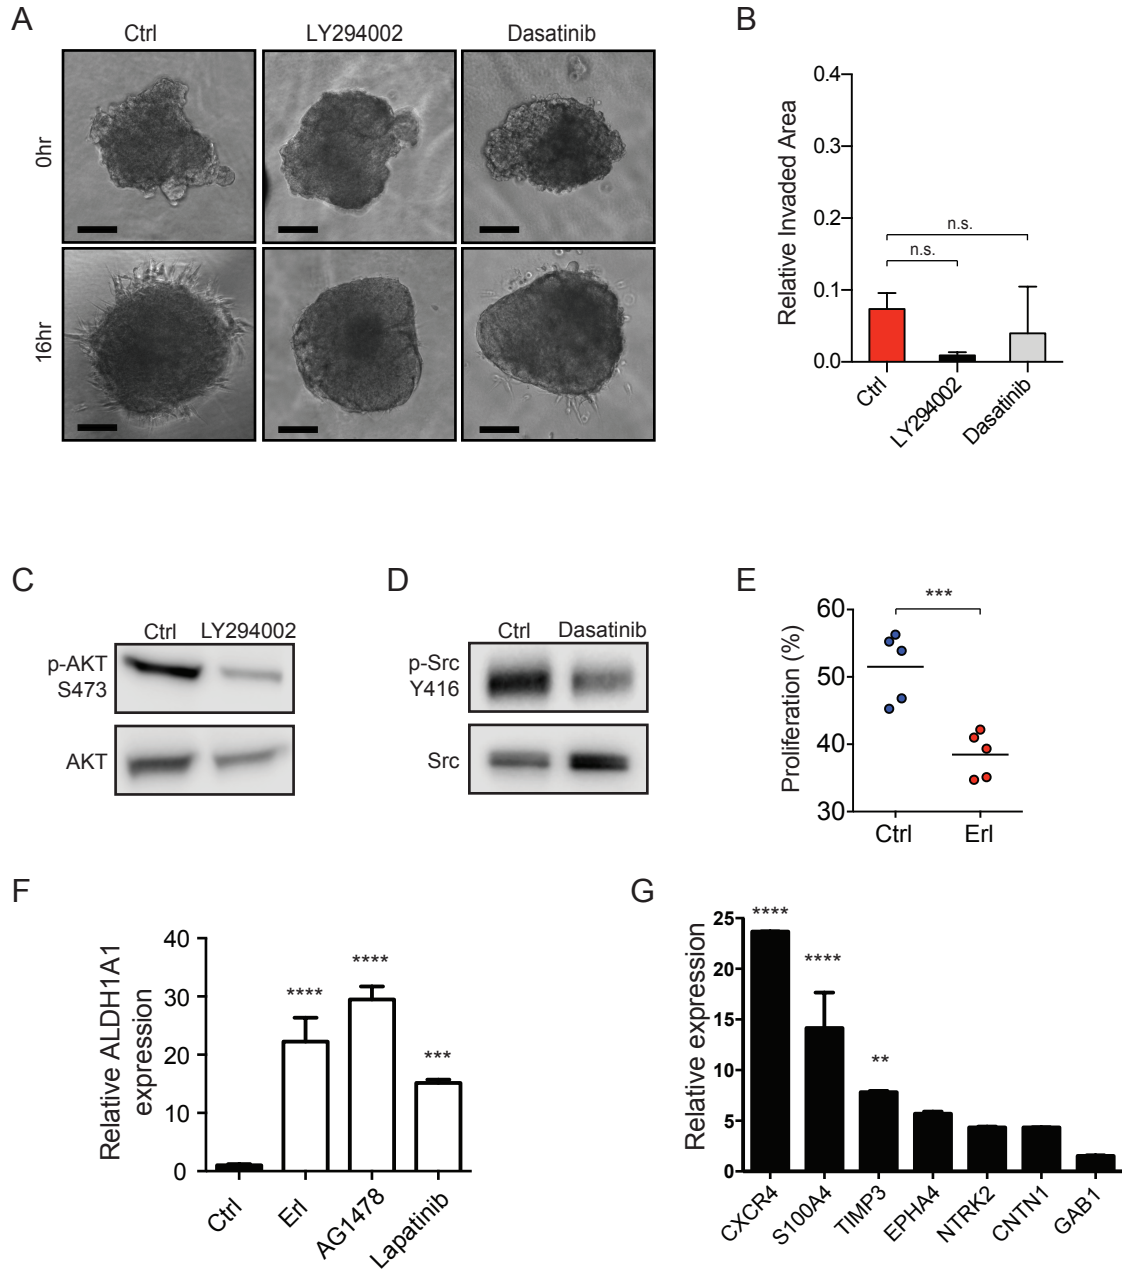

Supplement: NIHMS1533709-supplement-1.pdf [file NIHMS1533709-supplement-1.pdf]
